# Supplementary material for: AgroML: An Open-Source Repository to Forecast Reference Evapotranspiration in Different Geo-Climatic Conditions Using Machine Learning and Transformer-Based Models
Source: MDPI journal article supplement (doi:10.3390/agronomy12030656), 2022-03-08
Supplement: s1 [file s1]

Archive with 1 entries (1 files):
- agronomy-1604187-supplementary.pdf
