# Supplementary material for: AgroML: An Open-Source Repository to Forecast Reference Evapotranspiration in Different Geo-Climatic Conditions Using Machine Learning and Transformer-Based Models
Source: MDPI journal article supplement (doi:10.3390/agronomy12030656), 2022-03-08
Supplement: s1 [file s1 › agronomy-1604187-supplementary.pdf]

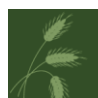

**Table S1.** Hyperparameter space for all the models assessed in this work. MLP – Multilayer Perceptron, RF – Random Forest, SVR – Support Vector Regression, ELM – Extreme Learning Machine, CNN – Convolutional Neural Network, LSTM – Long Short-Term Memory, TransformerCNN – Transformer using CNN in the feed-forward layer, Transformer LSTM – Transformer using LSTM in the feed-forward layer,

| Model          | Hyperparameter                                                 | Space                                           |
|----------------|----------------------------------------------------------------|-------------------------------------------------|
| MLP            | Number of hidden layers                                        | Up to 5                                         |
|                | Number of neurons                                              | Up to 20                                        |
|                | Activation function                                            | ReLU, Sigmoid and Tanh                          |
|                | Maximum number of epochs                                       | 150                                             |
| RF             | Number of trees in the forest                                  | From 10 to 1000                                 |
|                | Number of features to consider when looking for the best split | Sqrt, Log2                                      |
| SVR            | Kernel                                                         | Linear, Poly, Rbf, Sigmoid                      |
|                | c                                                              | From 0.01 to 10                                 |
|                | Epsilon                                                        | From 0.01 to 10                                 |
| ELM            | Maximum number of neurons                                      | 150                                             |
|                | Activation function                                            | Linear, Sigmoid, Tanh, Rbf_l1, Rbf_l2, Rbf_Linf |
| CNN            | Number of convolutional block layers                           | From 1 to 5                                     |
|                | Number of convolutional layers in the block                    | From 1 to 5                                     |
|                | Number of filters                                              | From 16 to 64                                   |
|                | Length of the convolutional window                             | From 1 to 20                                    |
|                | Length of the pooling window                                   | From 1 to 5                                     |
|                | Type of pooling function                                       | Average and Maximum                             |
|                | Number of hidden layers                                        | From 1 to 3                                     |
|                | Number of neurons                                              | From 1 to 20                                    |
|                | Activation function                                            | ReLU                                            |
|                | Optimizer function                                             | Adam                                            |
|                | Maximum number of epochs                                       | 150                                             |
| LSTM           | Number of layers                                               | From 1 to 5                                     |
|                | Number units                                                   | From 16 to 64                                   |
|                | Number of hidden layers                                        | From 1 to 3                                     |
|                | Number of neurons                                              | From 1 to 20                                    |
|                | Activation function                                            | ReLU                                            |
|                | Optimizer function                                             | Adam                                            |
|                | Maximum number of epochs                                       | 150                                             |
| TransformerCNN | Number of attention heads                                      | From 1 to 5                                     |
|                | Size of the head                                               | From 1 to 5                                     |
|                | Number of filters                                              | From 16 to 64                                   |
|                | Number of transformers blocks                                  | From 1 to 3                                     |

|                 |                                    |              |
|-----------------|------------------------------------|--------------|
|                 | Length of the convolutional window | From 1 to 20 |
|                 | Number of hidden layers            | Up 1 to 3    |
|                 | Number of neurons                  | Up to 20     |
|                 | Maximum number of epochs           | 150          |
| TransformerLSTM | Number of attention heads          | From 1 to 5  |
|                 | Size of the head                   | From 1 to 5  |
|                 | Number of units                    | Fro 16 to 64 |
|                 | Number of transformers blocks      | From 1 to 3  |
|                 | Number of hidden layers            | Up 1 to 3    |
|                 | Number of neurons                  | Up to 20     |
|                 | Maximum number of epochs           | 150          |

**Table S2.** Fittest hyperparameters for the best model and configuration at every location

| Model | Station | Conf | Hyperparameters                                                                                                                                                                                                 |
|-------|---------|------|-----------------------------------------------------------------------------------------------------------------------------------------------------------------------------------------------------------------|
| CNN   | ALM04   | 7    | n_conv_layers = 1<br>n_conv_base = 5<br>n_filters = 38<br>n_kernels = 20<br>type_pool = Max,<br>pool_size = 2<br>n_hidden_layers = 1<br>n_neurons = 20<br>epochs = 150<br>activation = relu<br>optimizer = adam |
| CNN   | CAD05   | 26   | n_conv_layers = 1<br>n_conv_base = 5<br>n_filters = 64<br>n_kernels = 20<br>type_pool = Avg<br>pool_size = 4<br>n_hidden_layers = 3<br>n_neurons = 20<br>epochs = 149<br>activation = relu<br>optimizer = adam  |
| CNN   | COR06   | 4    | n_conv_layers = 1<br>n_conv_base = 3<br>n_filters = 37<br>n_kernels = 18<br>type_pool = Avg                                                                                                                     |

|      |       |    |                                                                                                                                                                                                                |
|------|-------|----|----------------------------------------------------------------------------------------------------------------------------------------------------------------------------------------------------------------|
|      |       |    | pool_size = 2<br>n_hidden_layers = 2<br>n_neurons = 9<br>epochs = 145<br>activation = relu<br>optimizer = adam                                                                                                 |
| CNN  | HUE06 | 4  | n_conv_layers = 1<br>n_conv_base = 1<br>n_filters = 42<br>n_kernels = 20<br>type_pool = Avg<br>pool_size = 2<br>n_hidden_layers = 1<br>n_neurons = 20<br>epochs = 150<br>activation = relu<br>optimizer = adam |
| CNN  | MAG01 | 22 | n_conv_layers = 1<br>n_conv_base = 1<br>n_filters = 32<br>n_kernels = 10<br>type_pool = Avg<br>pool_size = 5<br>n_hidden_layers = 1<br>n_neurons = 19<br>epochs = 149<br>activation = relu<br>optimizer = adam |
| ELM  | ALM04 | 1  | activation = rbf_l2<br>neurons = 145                                                                                                                                                                           |
| ELM  | CAD05 | 2  | activation = rbf_l2<br>neurons = 150                                                                                                                                                                           |
| ELM  | COR06 | 1  | activation = rbf_l2<br>neurons = 150                                                                                                                                                                           |
| ELM  | HUE06 | 22 | activation = rbf_l2<br>neurons = 150                                                                                                                                                                           |
| ELM  | MAG01 | 4  | activation = rbf_l2<br>neurons = 150                                                                                                                                                                           |
| LSTM | ALM04 | 6  | n_layers = 1<br>units = 64<br>n_hidden_layers = 1<br>n_neurons = 20                                                                                                                                            |

|      |       |    |                                                                                                                              |
|------|-------|----|------------------------------------------------------------------------------------------------------------------------------|
|      |       |    | epochs = 150<br>activation = relu<br>optimizer = adam                                                                        |
| LSTM | CAD05 | 14 | n_layers = 1<br>units = 59<br>n_hidden_layers = 1<br>n_neurons = 20<br>epochs = 150<br>activation = relu<br>optimizer = adam |
| LSTM | COR06 | 16 | n_layers = 1<br>units = 64<br>n_hidden_layers = 1<br>n_neurons = 20<br>epochs = 150<br>activation = relu<br>optimizer = adam |
| LSTM | HUE06 | 8  | n_layers = 1<br>units = 64<br>n_hidden_layers = 1<br>n_neurons = 15<br>epochs = 150<br>activation = relu<br>optimizer = adam |
| LSTM | MAG01 | 22 | n_layers = 1<br>units = 47<br>n_hidden_layers = 2<br>n_neurons = 15<br>epochs = 150<br>activation = relu<br>optimizer = adam |
| MLP  | ALM04 | 13 | activation = relu<br>optimizer = adam<br>epochs = 59<br>neurons = [18, 16, 14, 9]                                            |
| MLP  | CAD05 | 14 | activation = relu<br>optimizer = adam<br>epochs = 100<br>neurons = [20, 20]                                                  |
| MLP  | COR06 | 7  | activation = relu<br>optimizer = adam<br>epochs = 66                                                                         |

|                 |       |    |                                                                                                                                                              |
|-----------------|-------|----|--------------------------------------------------------------------------------------------------------------------------------------------------------------|
|                 |       |    | neurons = [13, 15, 18, 9, 14]                                                                                                                                |
| MLP             | HUE06 | 2  | activation = relu<br>optimizer = adam<br>epochs = 100<br>neurons = [20, 18, 13]                                                                              |
| MLP             | MAG01 | 25 | activation = relu<br>optimizer = adam<br>epochs = 23<br>neurons = [20, 12]                                                                                   |
| RF              | ALM04 | 3  | n_estimators = 70<br>max_features = log2                                                                                                                     |
| RF              | CAD05 | 16 | n_estimators = 69<br>max_features = log2                                                                                                                     |
| RF              | COR06 | 13 | n_estimators = 100<br>max_features = sqrt                                                                                                                    |
| RF              | HUE06 | 18 | n_estimators = 75<br>max_features = log2                                                                                                                     |
| RF              | MAG01 | 5  | n_estimators = 60<br>max_features = log2                                                                                                                     |
| SVM             | ALM04 | 21 | kernel = rbf<br>c = 5.680<br>epsilon = 0.103                                                                                                                 |
| SVM             | CAD05 | 26 | kernel = poly<br>c = 2.203<br>epsilon = 0.077                                                                                                                |
| SVM             | COR06 | 13 | kernel = linear<br>c = 10.0<br>epsilon = 0.111                                                                                                               |
| SVM             | HUE06 | 11 | kernel = rbf<br>c = 0.805<br>epsilon = 0.052                                                                                                                 |
| SVM             | MAG01 | 2  | kernel = rbf<br>c = 1.388<br>epsilon = 0.287                                                                                                                 |
| Transformer CNN | ALM04 | 5  | head_size = 4<br>num_heads = 4<br>ff_dim = 29<br>num_transformer_blocks = 2<br>n_hidden_layers = 2<br>n_hidden_neurons = 17<br>n_kernel = 4<br>n_strides = 2 |

|                  |       |    |                                                                                                                                                              |
|------------------|-------|----|--------------------------------------------------------------------------------------------------------------------------------------------------------------|
| Transformer CNN  | CAD05 | 20 | head_size = 3<br>num_heads = 3<br>ff_dim = 29<br>num_transformer_blocks = 2<br>n_hidden_layers = 2<br>n_hidden_neurons = 16<br>n_kernel = 2<br>n_strides = 3 |
| Transformer CNN  | COR06 | 2  | head_size = 3<br>num_heads = 5<br>ff_dim = 22<br>num_transformer_blocks = 2<br>n_hidden_layers = 1<br>n_hidden_neurons = 19<br>n_kernel = 4<br>n_strides = 5 |
| Transformer CNN  | HUE06 | 13 | head_size = 5<br>num_heads = 3<br>ff_dim = 29<br>num_transformer_blocks = 3<br>n_hidden_layers = 1<br>n_hidden_neurons = 14<br>n_kernel = 2<br>n_strides = 1 |
| Transformer CNN  | MAG01 | 4  | head_size = 5<br>num_heads = 4<br>ff_dim = 14<br>num_transformer_blocks = 3<br>n_hidden_layers = 1<br>n_hidden_neurons = 5<br>n_kernel = 5<br>n_strides = 2  |
| Transformer LSTM | ALM04 | 3  | head_size = 1<br>num_heads = 5<br>lstm_units = 64<br>num_transformer_blocks = 3<br>n_hidden_layers = 1<br>n_hidden_neurons = 20                              |
| Transformer LSTM | CAD05 | 18 | head_size = 2<br>num_heads = 3<br>lstm_units = 56<br>num_transformer_blocks = 2                                                                              |

|                  |       |    |                            |
|------------------|-------|----|----------------------------|
|                  |       |    | n_hidden_layers = 2        |
|                  |       |    | n_hidden_neurons = 10      |
| Transformer LSTM | COR06 | 8  | head_size = 3              |
|                  |       |    | num_heads = 2              |
|                  |       |    | lstm_units = 52            |
|                  |       |    | num_transformer_blocks = 3 |
|                  |       |    | n_hidden_layers = 1        |
|                  |       |    | n_hidden_neurons = 12      |
| Transformer LSTM | HUE06 | 10 | head_size = 5              |
|                  |       |    | num_heads = 1              |
|                  |       |    | lstm_units = 64            |
|                  |       |    | num_transformer_blocks = 3 |
|                  |       |    | n_hidden_layers = 1        |
|                  |       |    | n_hidden_neurons = 20      |
| Transformer LSTM | MAG01 | 4  | head_size = 5              |
|                  |       |    | num_heads = 4              |
|                  |       |    | lstm_units = 49            |
|                  |       |    | num_transformer_blocks = 2 |
|                  |       |    | n_hidden_layers = 2        |
|                  |       |    | n_hidden_neurons = 16      |
